# Supplementary material for: Host Phylogeny Determines Viral Persistence and Replication in Novel Hosts
Source: PLoS Pathog. 2011 Sep 22;7(9):e1002260. doi: 10.1371/journal.ppat.1002260 (PMC3178573; doi:10.1371/journal.ppat.1002260)
Supplement: Dataset S8 — Accession numbers of sequences used in phylogenetic analysis in excel file. (XLS) [file ppat.1002260.s008.xls]

## Sheet: Sheet1
Species	Adh	AmyRel	COI	COII	28S(d1+d2)	RpL32	Sod	Missing per species
Drosophila affinis	AF459744+AF067280	AF037353	U51604.1 + AF519410.1 + JF735915	M95140	AF459744+AF067280+AF037353	JF735937	U47879	0
Drosophila algonquin	-	-	JF735923	M95144	JF735894	JF735989	-	3
Drosophila ambigua	X54813.1	-	EU493630.1	EU493759.1	X54813.1+-	JF735988	-	2
Drosophila americana	AF136650+U26837.1	AY736529	DQ471597.1	AY646727.1	JF735897	JF735938	-	1
Drosophila ananassae	AF459754	AF024691	AF050748.1 + AY098462.1	AF474077	JF735891	JF735939	GENOME SEQUENCE	0
Drosophila bifasciata	AF459745+U40986	AF251135	AF050749.1 + U51611.1	M95147	-	JF735940	U47869	1
Drosophila busckii	AB261141.1	AF071037.1	GU597451 + JF735924	GU597481	AY081367.1+X71273+ JF735900	-	U39445	1
Drosophila buzzatii	U65746	-	AF146157.1 + DQ202051.1 + JF735918	AF146169	AF184008.1+X71247	JF735942	-	2
Drosophila borealis	U26839.1	-	EU390720.1 and GQ244432.1 + JF735917	GQ244452.1	GQ244439.1 + JF735899	JF735941	-	2
Drosophila erecta	X54116	AF039562	AF050744.1	GENOME SEQUENCE	X71171	JF735943	AF127156	0
Drosophila flavomontana	U26838.1	-	JF735925	JF735932	JF735901	JF735944	-	2
Drosophila guanche	X60113	-	U51612.1	AF081354	-	JF735945	U47889	2
Drosophila hydei	X58694	AY733042	DQ471602.1	GU597488	GU597386+X71249	JF735946	U37714	0
Drosophila immigrans	M97638	AF491632	AF519388.1 + JF735926	AF478424	AF184006.1+X71231	JF735947	AF021825	0
Drosophila lacicola	U26841.1	-	JF735927	JF735933	JF735902	JF735948	-	2
Drosophila lini	AY331979	AF039559	JF735920	AY737618.1	JF735904	JF735949	-	1
Drosophila littoralis	DQ471662.1	AY733045.1	DQ471605.1|	FJ447340.1	JF735905	JF735950	-	1
Drosophila lummei	DQ471663.1	AY733046.1	DQ471606.1	AY646746.1	JF735906	JF735951	-	1
Drosophila mauritiana	Z00033	U96157	NC_005779.1	AF474081	X71163 + JF735893	JF735952	AF127158	0
Drosophila melanogaster	X98338	AF022713	M57910.1	U37541	GU597379+X71159	JF735953	X17332	0
Drosophila miranda	AY238781.1	Y15604.1	AF451104.1	M95148.1	EF216299.1+EF216299.1	JF735954	AY754566.1	0
Drosophila mojavensis	AY154827	GENOME SEQUENCE	DQ202071.1	AY437255.1	GENOME SEQUENCE+AJ308077	JF735955	GENOME SEQUENCE	0
Drosophila montana	U26842	-	DQ471608	DQ426799.1	JF735907	JF735956	-	2
Drosophila nebulosa	U95275	AY733060	U51603.1+ JF735914	AY335208.1	X71211 + JF735890	JF735957	AF021830	0
Drosophila nigromelanica	JF735882	JF735880	GU597455 + JF735928	GU597485	GU597384	JF735958	-	1
Drosophila novamexicana	AY165542.1	AY736484.1	JF735929	JF735934	AF184015.1+AF184015.1	JF735959	-	1
Drosophila obscura	U90955+ JF735883	AF306713.1	U51614.1 + JF735919	AF081356	EF216300.1+EF216300.1	JF735960	U47892	0
Drosophila orena	Z00032.1 OR AY279325.1	U96158.2 OR D21128.1	AY757281.1	AY757269.1	Z28549.1+X71173.1+ JF735909	JF735962	AF127155.1	0
Drosophila ohnishii	-	-	JF735930	AY737615.1	AY737624.1 + JF735908	JF735961	-	3
Drosophila paramelanica	AY750127.1	-	GU597453	GU597483	GU597382	JF735990	-	2
Drosophila persimilis	M60997	GENOME SEQUENCE	AF451101.1 + U51609.1	M95143	-	JF735963	U47873	1
Drosophila pseudoobscura	Y00602	U82556	AF519412.1 + U51606.1 + AF451073.1	AF519348.1	AF184016.1+X71203	JF735965	U47872	0
Drosophila pseudotakahashii	-	AY736499.1	AY757283.1	AY757271.1	JF735888	JF735966	-	2
Drosophila saltans	AB026533+AY335198.1	-	GU597450 + AY335204.1 + AF050751.1	GU597480	GU597380	JF735967	U37590	1
Drosophila santomea	AY804554.1	AY736503	GENOME SEQUENCE	DQ382822	-	JF735968	GENOME SEQUENCE	1
Drosophila sechellia	X04672	AF039558	NC_005780.1	AF200832	GENOME SEQUENCE+X71165	JF735969	AF127157	0
Drosophila simulans	M36581	U96159	NC_005781.1	AF200834	GENOME SEQUENCE+X71161	JF735970	X15685	0
Drosophila subobscura	M55545	U79724	AF519409.1 + U51615.1 + AF050750.1	M95151	-	JF735971	U38233	1
Drosophila takahashii	AF459749	U96161	AB027264.1 + X58915 + JF735911	AF474089	X71177 + JF735892	JF735972	-	1
Drosophila teissieri	X54118	AF039557	AF050743.1	DQ382819	X71169 + JF735895	JF735973	AF127160	0
Drosophila tenebrosa	JF735885	JF735881	JF735912	JF735931	JF735889	JF735974	-	1
Drosophila phalerata	AY095951.1+ JF735884	AY736492.1	AF519406	AF147115.1	X71255.1 + JF735887	JF735964	-	1
Drosophila trisitis	-	-	JF735913	EF216262.1	EF216307.1+EF216307.1	JF735975	-	3
Drosophila virilis	U26846	AF136603	DQ471577.1	DQ426813.1 + AY646749.1	AF184014.1+GENOME SEQUENCE	JF735976	X13831	0
Drosophila willistoni	U95251	AF039560	GENOME SEQUENCE	AY335206.1	GENOME SEQUENCE+X71209	JF735977	L13281	0
Drosophila yakuba	X54120	AF039561	NC_001322.1	X03240	X71167	JF735978	AF127159	0
Hirtodrosophila duncani	JF735886	-	GU597473 + JF735916	GU597505	GU597405	JF735979	-	2
Scaptodrosophila lebanonensis	M97637	-	EU493686 + JF735921	EU493815.1	JF735903	JF735980	AF021822	1
Scaptodrosophila stonei	DQ155672.1	-	JF735922	JF735936	AF184017.1	JF735981	-	2
Scaptomyza pallida	AB033645.1	AY736542.1	JF735910	JF735935	X71287.1 + JF735896	JF735991	-	1
Zaprionus bagyi	-	AY736515.1	EU493688.1	EU493817.1	JF735898	JF735982	-	2
Missing for each gene	5	15	0	0	5	1	24	Sum = 50
Sequences downloaded from Genbank
Sequenced during this project

## Sheet: Sheet2
RpL32.sqn Drosophila_affinis_RpL32 JF735937							RpL32.sqn	Drosophila_affinis_RpL32	JF735937	Drosophila affinis
								Drosophila_algonquin_RpL32	JF735989	Drosophila algonquin
								Drosophila_ambigua_RpL32	JF735988	Drosophila ambigua
RpL32.sqn Drosophila_americana_RpL32 JF735938							RpL32.sqn	Drosophila_americana_RpL32	JF735938	Drosophila americana
RpL32.sqn Drosophila_ananassae_RpL32 JF735939							RpL32.sqn	Drosophila_ananassae_RpL32	JF735939	Drosophila ananassae
RpL32.sqn Drosophila_bifasciata_RpL32 JF735940							RpL32.sqn	Drosophila_bifasciata_RpL32	JF735940	Drosophila bifasciata
RpL32.sqn Drosophila_borealis_RpL32 JF735941							RpL32.sqn			Drosophila busckii
								Drosophila_buzzatii_RpL32	JF735942	Drosophila buzzatii
RpL32.sqn Drosophila_buzzatii_RpL32 JF735942							RpL32.sqn	Drosophila_borealis_RpL32	JF735941	Drosophila borealis
RpL32.sqn Drosophila_erecta_RpL32 JF735943							RpL32.sqn	Drosophila_erecta_RpL32	JF735943	Drosophila erecta
RpL32.sqn Drosophila_flavomontana_RpL32 JF735944							RpL32.sqn	Drosophila_flavomontana_RpL32	JF735944	Drosophila flavomontana
RpL32.sqn Drosophila_guanche_RpL32 JF735945							RpL32.sqn	Drosophila_guanche_RpL32	JF735945	Drosophila guanche
RpL32.sqn Drosophila_hydei_RpL32 JF735946							RpL32.sqn	Drosophila_hydei_RpL32	JF735946	Drosophila hydei
RpL32.sqn Drosophila_immigrans_RpL32 JF735947							RpL32.sqn	Drosophila_immigrans_RpL32	JF735947	Drosophila immigrans
RpL32.sqn Drosophila_lacicola_RpL32 JF735948							RpL32.sqn	Drosophila_lacicola_RpL32	JF735948	Drosophila lacicola
RpL32.sqn Drosophila_lini_RpL32 JF735949							RpL32.sqn	Drosophila_lini_RpL32	JF735949	Drosophila lini
RpL32.sqn Drosophila_littoralis_RpL32 JF735950							RpL32.sqn	Drosophila_littoralis_RpL32	JF735950	Drosophila littoralis
RpL32.sqn Drosophila_lummei_RpL32 JF735951							RpL32.sqn	Drosophila_lummei_RpL32	JF735951	Drosophila lummei
RpL32.sqn Drosophila_mauritiana_RpL32 JF735952							RpL32.sqn	Drosophila_mauritiana_RpL32	JF735952	Drosophila mauritiana
RpL32.sqn Drosophila_melanogaster_RpL32 JF735953							RpL32.sqn	Drosophila_melanogaster_RpL32	JF735953	Drosophila melanogaster
RpL32.sqn Drosophila_miranda_RpL32 JF735954							RpL32.sqn	Drosophila_miranda_RpL32	JF735954	Drosophila miranda
RpL32.sqn Drosophila_mojavensis_RpL32 JF735955							RpL32.sqn	Drosophila_mojavensis_RpL32	JF735955	Drosophila mojavensis
RpL32.sqn Drosophila_montana_RpL32 JF735956							RpL32.sqn	Drosophila_montana_RpL32	JF735956	Drosophila montana
RpL32.sqn Drosophila_nebulosa_RpL32 JF735957							RpL32.sqn	Drosophila_nebulosa_RpL32	JF735957	Drosophila nebulosa
RpL32.sqn Drosophila_nigromelanica_RpL32 JF735958							RpL32.sqn	Drosophila_nigromelanica_RpL32	JF735958	Drosophila nigromelanica
RpL32.sqn Drosophila_novamexicana_RpL32 JF735959							RpL32.sqn	Drosophila_novamexicana_RpL32	JF735959	Drosophila novamexicana
RpL32.sqn Drosophila_obscura_RpL32 JF735960							RpL32.sqn	Drosophila_obscura_RpL32	JF735960	Drosophila obscura
RpL32.sqn Drosophila_ohnishii_RpL32 JF735961							RpL32.sqn	Drosophila_orena_RpL32	JF735962	Drosophila orena
RpL32.sqn Drosophila_orena_RpL32 JF735962							RpL32.sqn	Drosophila_ohnishii_RpL32	JF735961	Drosophila ohnishii
								Drosophila_paramelanica_RpL32	JF735990	Drosophila paramelanica
RpL32.sqn Drosophila_persimilis_RpL32 JF735963							RpL32.sqn	Drosophila_persimilis_RpL32	JF735963	Drosophila persimilis
RpL32.sqn Drosophila_phalerata_RpL32 JF735964							RpL32.sqn	Drosophila_pseudoobscura_RpL32	JF735965	Drosophila pseudoobscura
RpL32.sqn Drosophila_pseudoobscura_RpL32 JF735965							RpL32.sqn	Drosophila_pseudotakahashii_RpL32	JF735966	Drosophila pseudotakahashii
RpL32.sqn Drosophila_pseudotakahashii_RpL32 JF735966							RpL32.sqn	Drosophila_saltans_RpL32	JF735967	Drosophila saltans
RpL32.sqn Drosophila_saltans_RpL32 JF735967							RpL32.sqn	Drosophila_santomea_RpL32	JF735968	Drosophila santomea
RpL32.sqn Drosophila_santomea_RpL32 JF735968							RpL32.sqn	Drosophila_sechellia_RpL32	JF735969	Drosophila sechellia
RpL32.sqn Drosophila_sechellia_RpL32 JF735969							RpL32.sqn	Drosophila_simulans_RpL32	JF735970	Drosophila simulans
RpL32.sqn Drosophila_simulans_RpL32 JF735970							RpL32.sqn	Drosophila_subobscura_RpL32	JF735971	Drosophila subobscura
RpL32.sqn Drosophila_subobscura_RpL32 JF735971							RpL32.sqn	Drosophila_takahashii_RpL32	JF735972	Drosophila takahashii
RpL32.sqn Drosophila_takahashii_RpL32 JF735972							RpL32.sqn	Drosophila_teisseri_RpL32	JF735973	Drosophila teissieri
RpL32.sqn Drosophila_teisseri_RpL32 JF735973							RpL32.sqn	Drosophila_tenebrosa_RpL32	JF735974	Drosophila tenebrosa
								Drosophila_phalerata_RpL32	JF735964	Drosophila phalerata
RpL32.sqn Drosophila_tenebrosa_RpL32 JF735974							RpL32.sqn	Drosophila_tristis_RpL32	JF735975	Drosophila trisitis
RpL32.sqn Drosophila_tristis_RpL32 JF735975							RpL32.sqn	Drosophila_virilis_RpL32	JF735976	Drosophila virilis
RpL32.sqn Drosophila_virilis_RpL32 JF735976							RpL32.sqn	Drosophila_willistoni_RpL32	JF735977	Drosophila willistoni
RpL32.sqn Drosophila_willistoni_RpL32 JF735977							RpL32.sqn	Drosophila_yakuba_RpL32	JF735978	Drosophila yakuba
RpL32.sqn Drosophila_yakuba_RpL32 JF735978							RpL32.sqn	Hitrodrosophila_duncani_RpL32	JF735979	Hirtodrosophila duncani
RpL32.sqn Hitrodrosophila_duncani_RpL32 JF735979							RpL32.sqn	Scaptodrosophila_lebanonensis_RpL32	JF735980	Scaptodrosophila lebanonensis
RpL32.sqn Scaptodrosophila_lebanonensis_RpL32 JF735980							RpL32.sqn	Scaptodrosophila_stonei_RpL32	JF735981	Scaptodrosophila stonei
RpL32.sqn Scaptodrosophila_stonei_RpL32 JF735981							RpL32.sqn	Scaptomyza_pallida_RpL32	JF735991	Scaptomyza pallida
RpL32.sqn Zaprionous_badyi_RpL32 JF735982							RpL32.sqn	Zaprionous_badyi_RpL32	JF735982	Zaprionus bagyi
RpL32.sqn Drosophila_bocqueti_RpL32 JF735983							RpL32.sqn
RpL32.sqn Drosophila_mulleri_RpL32 JF735984							RpL32.sqn
RpL32.sqn Drosophila_pseudoananassae_RpL32 JF735985							RpL32.sqn
RpL32.sqn Drosophila_elegans_RpL32 JF735986							RpL32.sqn
RpL32.sqn Drosophila_repleta_RpL32 JF735987							RpL32.sqn
RpL32.sqn Drosophila_ambigua_RpL32 JF735988							RpL32.sqn
RpL32.sqn Drosophila_algonquin_RpL32 JF735989							RpL32.sqn
RpL32.sqn Drosophila_paramelanica_RpL32 JF735990							RpL32.sqn
RpL32.sqn Scaptomyza_pallida_RpL32 JF735991							RpL32.sqn
